# Supplementary material
Source: PubMed Central journal article supplement (PMC6487546)
Supplement: jama-321-1587-s001.pdf [file jama-321-1587-s001.pdf]

## Supplementary Online Content

Yang L, Cao C, Kantor ED, et al. Trends in sedentary behavior among the US population, 2001-2016. *JAMA*. doi:10.1001/jama.2019.3636

### Supplementary Content

#### eMethods

**eTable 1.** Assessment of Sedentary Behaviors, NHANES 2001-2016

**eTable 2.** Sample Size for Daily Sedentary Behaviors Among US Adults by Sociodemographic and Lifestyle Characteristics, NHANES 2015-2016

**eTable 3.** Sample Size for Crude Weighted Trends in Sedentary Behaviors Among US Population, NHANES 2001-2016

**eTable 4.** Crude Weighted Trends in Sedentary Behaviors Overall and According to Race/Ethnicity Among US Population, NHANES 2001-2016

**eTable 5.** Age- and Multivariable-adjusted Weighted Associations of Survey Cycle and Prevalence of Screen-based Sedentary Behaviors Overall and According to Race/Ethnicity, NHANES 2001-2016

**eTable 6.** Estimated Prevalence of Sitting watching TV/videos ( $\geq 2$  hours/day) in the US Population by Sociodemographic and Lifestyle Characteristics, NHANES 2015-2016

**eTable 7.** Weighted Logistic Regression Models of Screen-Based Sedentary Behaviors, NHANES 2015-2016

**eTable 8.** Weighted Association of Survey Cycle and Total Sitting Time Among US Adults and Adolescents Overall and According to Race/Ethnicity, NHANES 2007-2016

**eTable 9.** Weighted Linear Regression Models of Total Sitting Time Among Adults and Adolescents on Survey Cycle, NHANES 2007-2016

**eTable 10.** Weighted Linear Regression Models of Total Sitting Time Among Adults and Adolescents, NHANES 2015-2016

This supplementary material has been provided by the authors to give readers additional information about their work.

## **eMethods**

Levels of leisure time physical activity were assessed using separate questions in each age group. For children, times per week to play or exercise hard (enough to sweat and breath hard) were asked between cycles 2001-2002 to 2007-2008, whereas from cycles 2009-2010 onwards, days physically active at least 60 minutes in the past 7 days were asked. Children's leisure time physical activity was defined using a binary variable dichotomized by cycle-specific median cut-offs of responses to aforementioned questions to present inactive and active. Meanwhile in adolescents and adults, two questions were administrated asking if they engaged in sports or recreational activities for at least 10 minutes continuously over the past 30 days, at 1) vigorous and 2) moderate levels, respectively. Leisure time physical activity were defined by a binary variable, with "no" responses to both questions classified as inactive, whereas "yes" to any or both questions classified active.

Smoking status was assessed in adults only, defined as never smokers: did not smoke 100 cigarettes and do not smoke now; former smokers: smoked 100 cigarettes in life and do not smoke now; and current smokers: smoked 100 cigarettes in life and smoke now.

**eTable 1. Assessment of Sedentary Behaviors, NHANES 2001-2016**

| Cycle                                   | Variable | Children   | Adolescents | Adults    |                                                                                                                                                                                                                                                                 |
|-----------------------------------------|----------|------------|-------------|-----------|-----------------------------------------------------------------------------------------------------------------------------------------------------------------------------------------------------------------------------------------------------------------|
|                                         |          | 5-11 years | 12-19 years | ≥20 years |                                                                                                                                                                                                                                                                 |
| <b>Screen-based sedentary behaviors</b> |          |            |             |           |                                                                                                                                                                                                                                                                 |
| <b>Sitting watching TV/videos</b>       |          |            |             |           |                                                                                                                                                                                                                                                                 |
| 2001-2002                               | PAD590   | X          |             |           | Over the past 30 days, on average about how many hours per day did {you/SP} sit and watch TV or videos? Would you say... [Less than 1 hour / 1 hour / 2 hours / 3 hours / 4 hours / 5 hours or more / None / Refused / Don't know]                              |
| 2003-2004                               | PAD590   | X          | X           | X         | Over the past 30 days, on average about how many hours per day did {you/SP} sit and watch TV or videos? Would you say... [Less than 1 hour / 1 hour / 2 hours / 3 hours / 4 hours / 5 hours or more / None / Refused / Don't know]                              |
| 2005-2006                               | PAD590   | X          | X           | X         | Over the past 30 days, on average about how many hours per day did {you/SP} sit and watch TV or videos? Would you say... [Less than 1 hour / 1 hour / 2 hours / 3 hours / 4 hours / 5 hours or more / None / Refused / Don't know]                              |
| 2007-2008                               | PAD590   | X          |             |           | Over the past 30 days, on average how many hours per day did {SP} sit and watch TV or videos? Would you say ... [Less than 1 hour / 1 hour / 2 hours / 3 hours / 4 hours / 5 hours or more, or / None]                                                          |
| 2009-2010                               | PAD590   | X          |             |           | Over the past 30 days, on average how many hours per day did {SP} sit and watch TV or videos? Would you say ... [Less than 1 hour / 1 hour / 2 hours / 3 hours / 4 hours / 5 hours or more / None / Refused / Don't know]                                       |
| 2011-2012                               | PAQ710   | X          | X           | X         | Over the past 30 days, on average how many hours per day did {you/SP} sit and watch TV or videos? Would you say... [Less than 1 hour / 1 hour / 2 hours / 3 hours / 4 hours / 5 hours or more / {You do/SP does} not watch TV or videos / Refused / Don't know] |
| 2013-2014                               | PAQ710   | X          | X           | X         | Over the past 30 days, on average how many hours per day did {you/SP} sit and watch TV or videos? Would you say... [Less than 1 hour / 1 hour / 2 hours / 3 hours / 4 hours / 5 hours or more / {You do/SP does} not watch TV or videos / Refused / Don't know] |
| 2015-2016                               | PAQ710   | X          | X           | X         | Over the past 30 days, on average how many hours per day did {you/SP} sit and watch TV or videos? Would you say... [Less than 1 hour / 1 hour / 2 hours / 3 hours / 4 hours / 5 hours or more / {You do/SP does} not watch TV or videos / Refused / Don't know] |
| <b>Computer use</b>                     |          |            |             |           |                                                                                                                                                                                                                                                                 |
| 2001-2002                               | PAD600   | X          |             |           | Over the past 30 days, on average about how many hours per day did {you/SP} use a computer or play computer games? Would you say... [Less than 1 hour / 1 hour / 2 hours / 3 hours / 4 hours / 5 hours or more / None / Refused / Don't know]                   |
| 2003-2004                               | PAD600   | X          | X           | X         | Over the past 30 days, on average about how many hours per day did {you/SP} use a computer or play computer games? Would you say... [Less than 1 hour / 1 hour / 2 hours / 3 hours / 4 hours / 5 hours or more / None / Refused / Don't know]                   |
| 2005-2006                               | PAD600   | X          | X           | X         | Over the past 30 days, on average about how many hours per day did {you/SP} use a computer or play computer games? Would you say... [Less than 1 hour / 1 hour / 2 hours / 3 hours / 4 hours / 5 hours or more / None / Refused / Don't know]                   |
| 2007-2008                               | PAD600   | X          |             |           | Over the past 30 days, on average how many hours per day did {SP} use a computer or play computer games outside of school? Would you say ... [Less than 1 hour / 1 hour / 2 hours / 3 hours / 4 hours / 5 hours or more / None / Refused / Don't know]          |

|                           |        |   |   |   |                                                                                                                                                                                                                                                                                                                                                                                                                |
|---------------------------|--------|---|---|---|----------------------------------------------------------------------------------------------------------------------------------------------------------------------------------------------------------------------------------------------------------------------------------------------------------------------------------------------------------------------------------------------------------------|
| 2009-2010                 | PAD600 | X |   |   | Over the past 30 days, on average how many hours per day did {SP} use a computer or play computer games outside of school? Would you say ... [Less than 1 hour / 1 hour / 2 hours / 3 hours / 4 hours / 5 hours or more / None / Refused / Don't know]                                                                                                                                                         |
| 2011-2012                 | PAQ715 | X | X | X | Over the past 30 days, on average how many hours per day did {you/SP} use a computer or play computer games outside of work or school? Include Playstation, Nintendo DS, or other portable video games. Would you say... [Less than 1 hour / 1 hour / 2 hours / 3 hours / 4 hours / 5 hours or more / {You do/SP does} not use a computer outside of work or school / Refused / Don't know]                    |
| 2013-2014                 | PAQ715 | X | X | X | Over the past 30 days, on average how many hours per day did {you/SP} use a computer or play computer games outside of work or school? Include Playstation, Nintendo DS, or other portable video games. Would you say... [Less than 1 hour / 1 hour / 2 hours / 3 hours / 4 hours / 5 hours or more / {You do/SP does} not use a computer outside of work or school / Refused / Don't know]                    |
| 2015-2016                 | PAQ715 | X | X | X | Over the past 30 days, on average how many hours per day did {you/SP} use a computer or play computer games outside of work or school? Include Playstation, Nintendo DS, or other portable video games. Would you say... [Less than 1 hour / 1 hour / 2 hours / 3 hours / 4 hours / 5 hours or more / {You do/SP does} not use a computer outside of work or school / Refused / Don't know]                    |
| <b>Total sitting time</b> |        |   |   |   |                                                                                                                                                                                                                                                                                                                                                                                                                |
| 2007-2008                 | PAD680 |   | X | X | The following question is about sitting or reclining at work, at home, or at school. Include time spent sitting at a desk, sitting with friends, traveling in a car, bus, or train, reading, playing cards, watching television, or using a computer. Do not include time spent sleeping. How much time {do you/does SP} usually spend sitting or reclining on a typical day? [minutes / Refused / Don't know] |
| 2009-2010                 | PAD680 |   | X | X | The following question is about sitting or reclining at work, at home, or at school. Include time spent sitting at a desk, sitting with friends, traveling in a car, bus, or train, reading, playing cards, watching television, or using a computer. Do not include time spent sleeping. How much time {do you/does SP} usually spend sitting or reclining on a typical day? [minutes / Refused / Don't know] |
| 2011-2012                 | PAQ680 |   | X | X | The following question is about sitting or reclining at work, at home, or at school. Include time spent sitting at a desk, sitting with friends, traveling in a car, bus, or train, reading, playing cards, watching television, or using a computer. Do not include time spent sleeping. How much time {do you/does SP} usually spend sitting or reclining on a typical day? [minutes / Refused / Don't know] |
| 2013-2014                 | PAQ680 |   | X | X | The following question is about sitting or reclining at work, at home, or at school. Include time spent sitting at a desk, sitting with friends, traveling in a car, bus, or train, reading, playing cards, watching television, or using a computer. Do not include time spent sleeping. How much time {do you/does SP} usually spend sitting or reclining on a typical day? [minutes / Refused / Don't know] |
| 2015-2016                 | PAQ680 |   | X | X | The following question is about sitting or reclining at work, at home, or at school. Include time spent sitting at a desk, sitting with friends, traveling in a car, bus, or train, reading, playing cards, watching television, or using a computer. Do not include time spent sleeping. How much time {do you/does SP} usually spend sitting or reclining on a typical day? [minutes / Refused / Don't know] |

**eTable 2. Sample Size for Daily Sedentary Behaviors Among US Adults by Socio-demographic and Lifestyle Characteristics, NHANES 2015-2016<sup>a,b</sup>**

|                                             | No. of Participants by Age Group (Weighted %) |             |            |
|---------------------------------------------|-----------------------------------------------|-------------|------------|
|                                             | ≥20 years                                     | 20-64 years | ≥65 years  |
| Overall                                     | 4542 (100)                                    | 3737 (100)  | 805 (100)  |
| Sex                                         |                                               |             |            |
| Female                                      | 2311 (50.4)                                   | 1937 (49.9) | 374 (53.1) |
| Male                                        | 2231 (49.6)                                   | 1800 (50.1) | 431 (46.9) |
| Race/ethnicity                              |                                               |             |            |
| Non-Hispanic white                          | 1408 (63.3)                                   | 1046 (60.4) | 362 (79.1) |
| Non-Hispanic black                          | 946 (11.2)                                    | 814 (12.0)  | 132 (6.9)  |
| Hispanic                                    | 1417 (15.9)                                   | 1205 (17.6) | 212 (6.7)  |
| Other <sup>c</sup>                          | 771 (9.6)                                     | 672 (10.0)  | 99 (7.3)   |
| Annual household income                     |                                               |             |            |
| <\$25,000                                   | 961 (13.6)                                    | 710 (12.9)  | 251 (17.5) |
| \$25,000-<\$75,000                          | 1805 (37.2)                                   | 1503 (36.2) | 302 (42.4) |
| ≥\$75,000                                   | 1288 (40.7)                                   | 1138 (42.9) | 150 (29.1) |
| Weight status <sup>d</sup>                  |                                               |             |            |
| Normal                                      | 1234 (27.7)                                   | 1032 (28.3) | 202 (24.3) |
| Overweight                                  | 1445 (31.5)                                   | 1130 (30.3) | 315 (38.0) |
| Obese                                       | 1652 (36.5)                                   | 1402 (37.0) | 250 (34.2) |
| Leisure-time physical activity <sup>e</sup> |                                               |             |            |
| Active                                      | 2441 (60.4)                                   | 2067 (61.1) | 374 (56.3) |
| Inactive                                    | 2101 (39.6)                                   | 1670 (38.9) | 431 (43.7) |
| Educational attainment                      |                                               |             |            |
| <High school                                | 969 (12.8)                                    | 750 (12.7)  | 219 (13.0) |
| High school                                 | 949 (19.8)                                    | 786 (19.7)  | 163 (20.5) |
| >High school                                | 2624 (67.4)                                   | 2201 (67.6) | 423 (66.5) |
| Smoking status                              |                                               |             |            |
| Never                                       | 2806 (59.5)                                   | 2389 (60.9) | 417 (51.8) |
| Former                                      | 948 (23.3)                                    | 633 (20.0)  | 315 (41.1) |
| Current                                     | 781 (17.1)                                    | 710 (19.0)  | 71 (6.7)   |

<sup>a</sup> Participant characteristics were presented according to age group: ≥20 years, 20-64 years, ≥65 years. Sample size was weighted to be nationally representative.

<sup>b</sup> No. of participants within each age group may not sum to equal the overall due to missing data. Weighted percentage may not sum to 100% due to missing data.

<sup>c</sup> "Other" includes race/ethnicity other than non-Hispanic white, non-Hispanic black, or Hispanic, including multiracial.

<sup>d</sup> For weight status definitions, see the Methods section.

<sup>e</sup> For leisure-time physical activity definitions, see the Methods section.

**eTable 3. Sample Size for Crude Weighted Trends in Sedentary Behaviors Among US Population, NHANES 2001-2016**

|                                                     |            | <b>Trends in Sedentary Behaviors, Sample Size</b> |                  |                  |                  |                  |                  |                  |                  |
|-----------------------------------------------------|------------|---------------------------------------------------|------------------|------------------|------------------|------------------|------------------|------------------|------------------|
|                                                     |            | <b>2001-2002</b>                                  | <b>2003-2004</b> | <b>2005-2006</b> | <b>2007-2008</b> | <b>2009-2010</b> | <b>2011-2012</b> | <b>2013-2014</b> | <b>2015-2016</b> |
| <b>Screen-based sedentary behaviors</b>             |            |                                                   |                  |                  |                  |                  |                  |                  |                  |
| <b><i>Sitting Watching Television or Videos</i></b> |            |                                                   |                  |                  |                  |                  |                  |                  |                  |
| 5-11 years                                          | N          | 1,296                                             | 1,139            | 1,236            | 1,140            | 1,308            | 1,378            | 1,430            | 1,415            |
|                                                     | Weighted N | 25,806,284                                        | 26,321,004       | 25,004,808       | 22,670,089       | 25,120,957       | 25,677,877       | 25,700,651       | 26,710,058       |
| 12-19 years                                         | N          |                                                   | 1,990            | 1,957            |                  |                  | 1,097            | 1257             | 1141             |
|                                                     | Weighted N |                                                   | 28,740,133       | 28,434,700       |                  |                  | 29,417,452       | 251,096,624      | 28,571,997       |
| ≥20 years                                           | N          |                                                   | 4,008            | 4,155            |                  |                  | 4,599            | 4,724            | 4,542            |
|                                                     | Weighted N |                                                   | 172,895,054      | 181,510,304      |                  |                  | 195,662,400      | 194,281,610      | 194,449,923      |
| 20-64 years                                         | N          |                                                   | 3,087            | 3,408            |                  |                  | 3,826            | 3,916            | 3,737            |
|                                                     | Weighted N |                                                   | 150,282,766      | 157,717,257      |                  |                  | 168,654,548      | 166,903,855      | 163,989,122      |
| ≥65 years                                           | N          |                                                   | 921              | 747              |                  |                  | 773              | 808              | 805              |
|                                                     | Weighted N |                                                   | 22,612,288       | 23,793,047       |                  |                  | 27,007,852       | 27,377,755       | 30,460,801       |
| <b><i>Computer Use Outside School or Work</i></b>   |            |                                                   |                  |                  |                  |                  |                  |                  |                  |
| 5-11 years                                          | N          | 1,296                                             | 1,139            | 1,236            | 1,140            | 1,308            | 1,378            | 1,430            | 1,415            |
|                                                     | Weighted N | 25,806,284                                        | 26,321,004       | 25,004,808       | 22,670,089       | 25,120,957       | 25,677,877       | 25,700,651       | 26,710,058       |
| 12-19 years                                         | N          |                                                   | 1,990            | 1,957            |                  |                  | 1,097            | 1257             | 1141             |
|                                                     | Weighted N |                                                   | 28,740,133       | 28,434,700       |                  |                  | 29,417,452       | 251,096,624      | 28,571,997       |
| ≥20 years                                           | N          |                                                   | 4,008            | 4,155            |                  |                  | 4,599            | 4,724            | 4,542            |
|                                                     | Weighted N |                                                   | 172,895,054      | 181,510,304      |                  |                  | 195,662,400      | 194,281,610      | 194,449,923      |
| 20-64 years                                         | N          |                                                   | 3,087            | 3,408            |                  |                  | 3,826            | 3,916            | 3,737            |
|                                                     | Weighted N |                                                   | 150,282,766      | 157,717,257      |                  |                  | 168,654,548      | 166,903,855      | 163,989,122      |
| ≥65 years                                           | N          |                                                   | 921              | 747              |                  |                  | 773              | 808              | 805              |
|                                                     | Weighted N |                                                   | 22,612,288       | 23,793,047       |                  |                  | 27,007,852       | 27,377,755       | 30,460,801       |
| <b>Total Sitting Time</b>                           |            |                                                   |                  |                  |                  |                  |                  |                  |                  |
| 12-19 years                                         | N          |                                                   |                  |                  | 1,031            | 1,161            | 1,093            | 1,248            | 1,129            |
|                                                     | Weighted N |                                                   |                  |                  | 28,166,458       | 29,061,996       | 29,363,866       | 29,845,825       | 28,273,402       |
| ≥20 years                                           | N          |                                                   |                  |                  | 4,798            | 5,059            | 4,578            | 4,697            | 4,494            |
|                                                     | Weighted N |                                                   |                  |                  | 183,760,009      | 187,137,602      | 195,007,127      | 193,269,559      | 192,793,057      |
| 20-64 years                                         | N          |                                                   |                  |                  | 3,821            | 4,109            | 3,807            | 3,893            | 3,699            |
|                                                     | Weighted N |                                                   |                  |                  | 161,108,699      | 161,853,299      | 168,106,308      | 165,989,984      | 162,636,061      |
| ≥65 years                                           | N          |                                                   |                  |                  | 977              | 950              | 771              | 804              | 795              |
|                                                     | Weighted N |                                                   |                  |                  | 22,651,310       | 25,284,303       | 26,900,819       | 27,279,574       | 30,156,996       |

**eTable 4. Crude Weighted Trends in Sedentary Behaviors Overall and According to Race/Ethnicity Among US Population, NHANES 2001-2016<sup>a,b</sup>**

|                                                                                  | Trends in Sedentary Behaviors |                               |                               |                               |                               |                               |                               |                               | $\beta$ (95% CI) <sup>c</sup> | P for Trend <sup>c</sup> | 2015-2016 vs 1 <sup>st</sup> Cycle, Difference (95% CI) <sup>d</sup> |
|----------------------------------------------------------------------------------|-------------------------------|-------------------------------|-------------------------------|-------------------------------|-------------------------------|-------------------------------|-------------------------------|-------------------------------|-------------------------------|--------------------------|----------------------------------------------------------------------|
|                                                                                  | 2001-2002                     | 2003-2004                     | 2005-2006                     | 2007-2008                     | 2009-2010                     | 2011-2012                     | 2013-2014                     | 2015-2016                     |                               |                          |                                                                      |
| <b>Screen-based sedentary behaviors</b>                                          |                               |                               |                               |                               |                               |                               |                               |                               |                               |                          |                                                                      |
| <b>Sitting Watching Television or Videos <math>\geq 2</math> h/d, Weighted %</b> |                               |                               |                               |                               |                               |                               |                               |                               |                               |                          |                                                                      |
| 5-11 years                                                                       |                               |                               |                               |                               |                               |                               |                               |                               |                               |                          |                                                                      |
| All                                                                              | <b>65.5</b><br>(59.1 to 72.0) | <b>72.6</b><br>(68.1 to 77.2) | <b>61.0</b><br>(56.3 to 65.7) | <b>63.2</b><br>(57.8 to 68.7) | <b>61.8</b><br>(54.5 to 69.1) | <b>63.6</b><br>(59.2 to 68.0) | <b>57.6</b><br>(53.7 to 61.4) | <b>62.2</b><br>(57.1 to 67.2) | -1.1<br>(-1.9 to -0.4)        | .004                     | -3.4<br>(-11.2 to 4.4)                                               |
| Non-Hispanic White                                                               | <b>64.3</b><br>(56.8 to 71.8) | <b>70.1</b><br>(63.5 to 76.6) | <b>55.2</b><br>(48.8 to 61.5) | <b>60.0</b><br>(53.2 to 66.8) | <b>59.9</b><br>(50.4 to 69.3) | <b>61.5</b><br>(54.4 to 68.6) | <b>53.6</b><br>(48.8 to 58.5) | <b>59.1</b><br>(52.7 to 65.5) | -1.2<br>(-2.2 to -0.3)        | .01                      | -5.1<br>(-14.6 to 4.3)                                               |
| Non-Hispanic black                                                               | <b>74.5</b><br>(68.4 to 80.6) | <b>81.4</b><br>(78.6 to 84.2) | <b>76.9</b><br>(72.1 to 81.7) | <b>75.5</b><br>(69.4 to 81.7) | <b>73.5</b><br>(67.5 to 79.4) | <b>78.9</b><br>(71.7 to 86.0) | <b>68.4</b><br>(64.7 to 72.1) | <b>75.3</b><br>(68.6 to 81.9) | -0.6<br>(-1.5 to 0.2)         | .12                      | 0.8<br>(-7.8 to 9.4)                                                 |
| Hispanic                                                                         | <b>63.1</b><br>(55.9 to 70.4) | <b>73.1</b><br>(66.2 to 80.0) | <b>66.7</b><br>(59.1 to 74.4) | <b>64.1</b><br>(59.4 to 68.7) | <b>59.7</b><br>(51.2 to 68.1) | <b>62.2</b><br>(56.9 to 67.6) | <b>62.9</b><br>(55.8 to 70.1) | <b>63.8</b><br>(56.2 to 71.3) | -0.7<br>(-1.8 to 0.4)         | .21                      | 0.6<br>(-9.4 to 10.7)                                                |
| 12-19 years                                                                      |                               |                               |                               |                               |                               |                               |                               |                               |                               |                          |                                                                      |
| All                                                                              |                               | <b>64.2</b><br>(59.4 to 68.9) | <b>57.5</b><br>(53.7 to 61.3) |                               |                               | <b>63.2</b><br>(57.5 to 69.0) | <b>60.6</b><br>(57.5 to 63.7) | <b>59.4</b><br>(53.7 to 65.0) | -0.2<br>(-1.1 to 0.6)         | .61                      | -4.8<br>(-11.8 to 2.3)                                               |
| Non-Hispanic white                                                               |                               | <b>62.4</b><br>(56.4 to 68.4) | <b>53.6</b><br>(50.2 to 57.1) |                               |                               | <b>60.4</b><br>(51.0 to 69.9) | <b>57.5</b><br>(51.5 to 63.5) | <b>55.3</b><br>(46.9 to 63.8) | -0.4<br>(-1.6 to 0.8)         | .50                      | -7.0<br>(-17.0 to 2.9)                                               |
| Non-Hispanic black                                                               |                               | <b>72.4</b><br>(66.9 to 77.9) | <b>74.6</b><br>(69.5 to 79.8) |                               |                               | <b>71.5</b><br>(66.1 to 76.8) | <b>68.3</b><br>(62.7 to 74.0) | <b>67.7</b><br>(61.3 to 74.2) | -1.0<br>(-2.0 to 0.1)         | .07                      | -4.7<br>(-12.8 to 3.4)                                               |
| Hispanic                                                                         |                               | <b>66.3</b><br>(59.3 to 73.4) | <b>60.2</b><br>(53.0 to 67.4) |                               |                               | <b>66.8</b><br>(59.3 to 74.3) | <b>64.9</b><br>(60.2 to 69.7) | <b>62.8</b><br>(57.0 to 68.6) | 0.1<br>(-1.1 to 1.2)          | .95                      | -3.5<br>(-12.3 to 5.3)                                               |
| $\geq 20$ years                                                                  |                               |                               |                               |                               |                               |                               |                               |                               |                               |                          |                                                                      |
| All                                                                              |                               | <b>64.7</b><br>(61.8 to 67.6) | <b>64.1</b><br>(62.1 to 66.1) |                               |                               | <b>66.9</b><br>(64.2 to 69.5) | <b>65.9</b><br>(64.0 to 67.9) | <b>65.1</b><br>(61.4 to 68.8) | 0.2<br>(-0.3 to 0.8)          | .38                      | 0.4<br>(-4.1 to 4.9)                                                 |
| Non-Hispanic white                                                               |                               | <b>63.4</b><br>(60.1 to 66.8) | <b>63.2</b><br>(61.0 to 65.4) |                               |                               | <b>66.8</b><br>(63.5 to 70.2) | <b>66.9</b><br>(64.0 to 69.7) | <b>66.5</b><br>(61.3 to 71.6) | 0.7<br>(-0.1 to 1.4)          | .05                      | 3.0<br>(-2.9 to 8.9)                                                 |
| Non-Hispanic black                                                               |                               | <b>73.6</b><br>(67.9 to 79.4) | <b>75.4</b><br>(70.0 to 80.8) |                               |                               | <b>77.3</b><br>(73.3 to 81.3) | <b>76.1</b><br>(71.5 to 80.7) | <b>73.3</b><br>(69.7 to 76.8) | 0.1<br>(-0.8 to 1.0)          | .88                      | -0.4<br>(-6.9 to 6.1)                                                |
| Hispanic                                                                         |                               | <b>65.9</b><br>(62.3 to 69.4) | <b>58.9</b><br>(53.7 to 64.2) |                               |                               | <b>62.3</b><br>(58.4 to 66.2) | <b>61.5</b><br>(58.6 to 64.4) | <b>58.7</b><br>(54.6 to 62.8) | -0.6<br>(-1.3 to 0.2)         | .12                      | -7.1<br>(-12.3 to -1.9)                                              |
| <b>Computer Use Outside School or Work <math>\geq 1</math> h/d, Weighted %</b>   |                               |                               |                               |                               |                               |                               |                               |                               |                               |                          |                                                                      |
| 5-11 years                                                                       |                               |                               |                               |                               |                               |                               |                               |                               |                               |                          |                                                                      |
| All                                                                              | <b>42.9</b><br>(39.7 to 46.0) | <b>36.8</b><br>(30.1 to 43.5) | <b>33.2</b><br>(28.4 to 38.0) | <b>41.4</b><br>(36.3 to 46.5) | <b>39.7</b><br>(34.0 to 45.4) | <b>47.1</b><br>(40.0 to 54.3) | <b>54.2</b><br>(50.4 to 57.9) | <b>55.9</b><br>(48.8 to 63.0) | 2.6<br>(1.8 to 3.4)           | <.001                    | 13.0<br>(5.6 to 20.5)                                                |

|                                                |                               |                               |                               |                               |                               |                               |                               |                               |                      |       |                        |
|------------------------------------------------|-------------------------------|-------------------------------|-------------------------------|-------------------------------|-------------------------------|-------------------------------|-------------------------------|-------------------------------|----------------------|-------|------------------------|
| Non-Hispanic white                             | <b>39.6</b><br>(34.8 to 44.4) | <b>35.2</b><br>(27.1 to 43.2) | <b>28.5</b><br>(23.2 to 33.9) | <b>37.2</b><br>(31.8 to 42.5) | <b>37.4</b><br>(28.0 to 46.8) | <b>48.1</b><br>(38.0 to 58.1) | <b>55.0</b><br>(47.9 to 62.0) | <b>53.1</b><br>(41.6 to 64.5) | 2.9<br>(1.7 to 4.1)  | <.001 | 13.5<br>(1.6 to 25.4)  |
| Non-Hispanic black                             | <b>61.2</b><br>(55.6 to 66.8) | <b>48.8</b><br>(40.9 to 56.7) | <b>50.1</b><br>(41.3 to 58.8) | <b>62.7</b><br>(58.4 to 67.0) | <b>56.1</b><br>(48.7 to 63.6) | <b>59.2</b><br>(52.7 to 65.7) | <b>59.3</b><br>(52.5 to 66.1) | <b>70.5</b><br>(61.9 to 79.2) | 1.6<br>(0.5 to 2.7)  | .005  | 9.4<br>(-0.5 to 19.2)  |
| Hispanic                                       | <b>37.8</b><br>(29.4 to 46.2) | <b>34.1</b><br>(26.6 to 41.6) | <b>27.6</b><br>(21.3 to 33.9) | <b>37.8</b><br>(33.2 to 42.4) | <b>32.9</b><br>(27.4 to 38.3) | <b>36.6</b><br>(30.6 to 42.5) | <b>50.4</b><br>(44.4 to 56.3) | <b>51.4</b><br>(46.2 to 56.6) | 2.5<br>(1.4 to 3.6)  | <.001 | 13.6<br>(4.1 to 23.1)  |
| <hr/>                                          |                               |                               |                               |                               |                               |                               |                               |                               |                      |       |                        |
| 12-19 years                                    |                               |                               |                               |                               |                               |                               |                               |                               |                      |       |                        |
| All                                            |                               | <b>52.6</b><br>(47.1 to 58.0) | <b>54.8</b><br>(50.7 to 59.0) |                               |                               | <b>62.4</b><br>(57.7 to 67.1) | <b>64.1</b><br>(59.2 to 68.9) | <b>57.4</b><br>(53.2 to 61.6) | 1.4<br>(0.5 to 2.3)  | .002  | 4.8<br>(-1.8 to 11.4)  |
| Non-Hispanic white                             |                               | <b>54.7</b><br>(48.3 to 61.0) | <b>57.6</b><br>(52.5 to 62.8) |                               |                               | <b>61.8</b><br>(53.5 to 70.1) | <b>64.4</b><br>(57.4 to 71.5) | <b>55.5</b><br>(48.5 to 62.6) | 0.8<br>(-0.4 to 2.0) | .20   | 0.9<br>(-8.2 to 10.0)  |
| Non-Hispanic black                             |                               | <b>48.5</b><br>(42.6 to 54.4) | <b>54.2</b><br>(42.8 to 65.6) |                               |                               | <b>71.9</b><br>(64.0 to 79.7) | <b>62.8</b><br>(57.0 to 68.7) | <b>55.9</b><br>(48.3 to 63.4) | 2.0<br>(0.6 to 3.5)  | .007  | 7.4<br>(-1.8 to 16.5)  |
| Hispanic                                       |                               | <b>41.6</b><br>(34.0 to 49.2) | <b>39.6</b><br>(31.7 to 47.6) |                               |                               | <b>52.4</b><br>(46.6 to 58.1) | <b>61.4</b><br>(56.1 to 66.6) | <b>56.0</b><br>(49.4 to 62.5) | 3.3<br>(2.0 to 4.6)  | <.001 | 14.4<br>(4.8 to 24.0)  |
| <hr/>                                          |                               |                               |                               |                               |                               |                               |                               |                               |                      |       |                        |
| ≥20 years                                      |                               |                               |                               |                               |                               |                               |                               |                               |                      |       |                        |
| All                                            |                               | <b>29.3</b><br>(27.0 to 31.5) | <b>32.0</b><br>(28.6 to 35.3) |                               |                               | <b>50.1</b><br>(45.7 to 54.6) | <b>49.0</b><br>(46.3 to 51.8) | <b>50.4</b><br>(47.7 to 53.1) | 3.9<br>(3.4 to 4.4)  | <.001 | 21.2<br>(17.8 to 24.5) |
| Non-Hispanic white                             |                               | <b>30.9</b><br>(27.9 to 33.9) | <b>33.3</b><br>(29.0 to 37.6) |                               |                               | <b>51.1</b><br>(45.0 to 57.3) | <b>50.8</b><br>(47.9 to 53.7) | <b>53.5</b><br>(49.4 to 57.5) | 4.1<br>(3.5 to 4.8)  | <.001 | 22.6<br>(17.8 to 27.4) |
| Non-Hispanic black                             |                               | <b>30.1</b><br>(26.3 to 34.0) | <b>35.9</b><br>(30.9 to 40.9) |                               |                               | <b>53.3</b><br>(49.5 to 57.1) | <b>49.9</b><br>(45.6 to 54.1) | <b>51.3</b><br>(45.6 to 57.0) | 3.7<br>(2.8 to 4.6)  | <.001 | 21.1<br>(14.6 to 27.7) |
| Hispanic                                       |                               | <b>18.4</b><br>(14.3 to 22.5) | <b>17.4</b><br>(13.8 to 21.1) |                               |                               | <b>37.5</b><br>(33.4 to 41.6) | <b>38.8</b><br>(34.7 to 42.9) | <b>36.0</b><br>(32.0 to 40.0) | 3.8<br>(3.0 to 4.5)  | <.001 | 17.6<br>(12.2 to 23.1) |
| <hr/>                                          |                               |                               |                               |                               |                               |                               |                               |                               |                      |       |                        |
| <b>Total Sitting Time (h/d), Weighted Mean</b> |                               |                               |                               |                               |                               |                               |                               |                               |                      |       |                        |
| 12-19 years                                    |                               |                               |                               |                               |                               |                               |                               |                               |                      |       |                        |
| All                                            |                               |                               |                               | <b>7.0</b><br>(6.7 to 7.4)    | <b>7.2</b><br>(6.7 to 7.6)    | <b>7.9</b><br>(7.5 to 8.4)    | <b>8.4</b><br>(8.0 to 8.7)    | <b>8.2</b><br>(7.9 to 8.4)    | 0.3<br>(0.3 to 0.4)  | <.001 | 1.1<br>(0.7 to 1.5)    |
| Non-Hispanic white                             |                               |                               |                               | <b>7.1</b><br>(6.7 to 7.6)    | <b>7.2</b><br>(6.5 to 7.8)    | <b>8.0</b><br>(7.4 to 8.7)    | <b>8.1</b><br>(7.6 to 8.6)    | <b>8.1</b><br>(7.8 to 8.4)    | 0.3<br>(0.2 to 0.4)  | <.001 | 1.0<br>(0.4 to 1.5)    |
| Non-Hispanic black                             |                               |                               |                               | <b>7.0</b><br>(6.3 to 7.7)    | <b>7.1</b><br>(6.6 to 7.6)    | <b>7.8</b><br>(7.3 to 8.3)    | <b>8.9</b><br>(8.7 to 9.1)    | <b>8.3</b><br>(7.9 to 8.8)    | 0.4<br>(0.3 to 0.6)  | <.001 | 1.4<br>(0.5 to 2.2)    |
| Hispanic                                       |                               |                               |                               | <b>6.7</b><br>(6.2 to 7.3)    | <b>7.2</b><br>(6.8 to 7.6)    | <b>7.7</b><br>(7.3 to 8.1)    | <b>8.4</b><br>(8.0 to 8.8)    | <b>8.1</b><br>(7.7 to 8.4)    | 0.4<br>(0.2 to 0.5)  | <.001 | 1.3<br>(0.7 to 1.9)    |
| <hr/>                                          |                               |                               |                               |                               |                               |                               |                               |                               |                      |       |                        |
| ≥20 years                                      |                               |                               |                               |                               |                               |                               |                               |                               |                      |       |                        |

|                    |                            |                            |                            |                            |                            |                     |       |                     |
|--------------------|----------------------------|----------------------------|----------------------------|----------------------------|----------------------------|---------------------|-------|---------------------|
| All                | <b>5.5</b><br>(5.2 to 5.7) | <b>5.6</b><br>(5.5 to 5.7) | <b>6.2</b><br>(6.0 to 6.5) | <b>7.0</b><br>(6.7 to 7.2) | <b>6.4</b><br>(6.2 to 6.6) | 0.3<br>(0.3 to 0.4) | <.001 | 1.0<br>(0.7 to 1.3) |
| Non-Hispanic white | <b>5.7</b><br>(5.4 to 6.1) | <b>5.9</b><br>(5.7 to 6.2) | <b>6.6</b><br>(6.3 to 6.8) | <b>7.1</b><br>(6.9 to 7.4) | <b>6.8</b><br>(6.5 to 7.1) | 0.3<br>(0.2 to 0.4) | <.001 | 1.0<br>(0.6 to 1.5) |
| Non-Hispanic black | <b>5.3</b><br>(4.8 to 5.7) | <b>5.2</b><br>(4.8 to 5.6) | <b>6.3</b><br>(5.7 to 6.9) | <b>7.4</b><br>(7.1 to 7.8) | <b>6.2</b><br>(5.8 to 6.5) | 0.4<br>(0.3 to 0.5) | <.001 | 0.9<br>(0.4 to 1.4) |
| Hispanic           | <b>4.1</b><br>(3.8 to 4.4) | <b>4.1</b><br>(3.9 to 4.4) | <b>4.7</b><br>(4.3 to 5.0) | <b>5.9</b><br>(5.5 to 6.2) | <b>5.2</b><br>(4.9 to 5.4) | 0.4<br>(0.3 to 0.5) | <.001 | 1.1<br>(0.7 to 1.5) |

<sup>a</sup> Among children 5-11 years old, adolescents 12-19 years, and adults  $\geq$  20 years, respectively.

<sup>b</sup> Weighted estimates and 95% CIs were estimated for each survey cycle. All estimates were weighted to be nationally representative.

<sup>c</sup> The estimate  $\beta$ , 95% CI, and *P* for trend were calculated using linear regression that included the National Health and Nutrition Examination Survey (NHANES) 2-year cycle as a continuous variable. The estimate  $\beta$  can be interpreted as the average percentage point change in prevalence every 2 years.

<sup>d</sup> A decrease difference below 0.

**eTable 5. Age- and Multivariable-adjusted Weighted Associations of Survey Cycle and Prevalence of Screen-based Sedentary Behaviors Overall and According to Race/Ethnicity, NHANES 2001-2016<sup>a</sup>**

|                            | Sitting Watching Television or Videos $\geq 2$ h/d |                                     |                            |                                     | Computer Use Outside School or Work $\geq 1$ h/d |                                     |                            |                                     |
|----------------------------|----------------------------------------------------|-------------------------------------|----------------------------|-------------------------------------|--------------------------------------------------|-------------------------------------|----------------------------|-------------------------------------|
|                            | Odds Ratios (95% CI)                               |                                     | Predicted Margins (95% CI) |                                     | Odds Ratios (95% CI)                             |                                     | Predicted Margins (95% CI) |                                     |
|                            | Age-Adjusted                                       | Multivariable-Adjusted <sup>b</sup> | Age-Adjusted               | Multivariable-Adjusted <sup>b</sup> | Age-adjusted                                     | Multivariable-Adjusted <sup>b</sup> | Age- Adjusted              | Multivariable-Adjusted <sup>b</sup> |
| <b>Children 5-11 years</b> |                                                    |                                     |                            |                                     |                                                  |                                     |                            |                                     |
| <b>All<sup>c</sup></b>     |                                                    |                                     |                            |                                     |                                                  |                                     |                            |                                     |
| 2001-2002                  | 1 [Reference]                                      | 1 [Reference]                       | 65.9 (59.6 to 72.2)        | 67.0 (60.3 to 73.8)                 | 1 [Reference]                                    | 1 [Reference]                       | 41.9 (38.5 to 45.2)        | 41.6 (38.6 to 44.5)                 |
| 2003-2004                  | 1.40 (1.00 to 1.98)                                | 1.24 (0.85 to 1.79)                 | 72.4 (68.3 to 76.5)        | 71.9 (67.8 to 76.1)                 | 0.78 (0.58 to 1.05)                              | 0.78 (0.58 to 1.03)                 | 36.3 (30.1 to 42.5)        | 35.4 (29.4 to 41.4)                 |
| 2005-2006                  | 0.82 (0.59 to 1.14)                                | 0.81 (0.57 to 1.15)                 | 61.7 (57.4 to 66.0)        | 62.3 (58.4 to 66.2)                 | 0.67 (0.52 to 0.85)                              | 0.65 (0.51 to 0.82)                 | 32.4 (28.0 to 36.8)        | 31.6 (27.2 to 36.0)                 |
| 2007-2008                  | 0.90 (0.64 to 1.27)                                | 0.85 (0.60 to 1.22)                 | 63.4 (58.5 to 68.4)        | 63.3 (58.9 to 67.6)                 | 0.93 (0.73 to 1.19)                              | 0.94 (0.75 to 1.19)                 | 40.3 (35.2 to 45.5)        | 40.0 (35.0 to 44.9)                 |
| 2009-2010                  | 0.85 (0.57 to 1.26)                                | 0.81 (0.54 to 1.22)                 | 61.7 (55.2 to 68.2)        | 62.5 (56.5 to 68.5)                 | 0.87 (0.67 to 1.13)                              | 0.88 (0.68 to 1.16)                 | 38.5 (33.0 to 44.0)        | 38.5 (33.0 to 44.1)                 |
| 2011-2012                  | 0.92 (0.67 to 1.27)                                | 0.93 (0.65 to 1.33)                 | 64.1 (60.0 to 68.3)        | 65.5 (61.5 to 69.6)                 | 1.21 (0.89 to 1.63)                              | 1.30 (0.95 to 1.77)                 | 47.2 (40.4 to 54.1)        | 48.0 (41.0 to 55.0)                 |
| 2013-2014                  | 0.71 (0.53 to 0.97)                                | 0.70 (0.49 to 1.00)                 | 57.7 (53.5 to 61.9)        | 58.8 (54.4 to 63.2)                 | 1.61 (1.33 to 1.95)                              | 1.65 (1.35 to 2.02)                 | 54.3 (50.7 to 57.8)        | 53.9 (49.9 to 57.9)                 |
| 2015-2016                  | 0.86 (0.62 to 1.21)                                | 0.85 (0.58 to 1.24)                 | 62.8 (58.1 to 67.5)        | 63.7 (58.9 to 68.5)                 | 1.72 (1.27 to 2.32)                              | 1.88 (1.41 to 2.52)                 | 56.6 (49.7 to 63.6)        | 57.3 (51.0 to 63.6)                 |
| <i>P</i> for trend         | .004                                               | .02                                 |                            |                                     | <.001                                            | <.001                               |                            |                                     |
| <b>Non-Hispanic white</b>  |                                                    |                                     |                            |                                     |                                                  |                                     |                            |                                     |
| 2001-2002                  | 1 [Reference]                                      | 1 [Reference]                       | 64.6 (57.2 to 72.0)        | 65.0 (56.6 to 73.4)                 | 1 [Reference]                                    | 1 [Reference]                       | 38.4 (33.1 to 43.7)        | 37.4 (32.0 to 42.7)                 |
| 2003-2004                  | 1.32 (0.86 to 2.00)                                | 1.14 (0.72 to 1.81)                 | 69.9 (64.4 to 75.4)        | 68.3 (62.3 to 74.2)                 | 0.84 (0.58 to 1.24)                              | 0.86 (0.58 to 1.28)                 | 34.9 (27.6 to 42.3)        | 33.7 (26.2 to 41.1)                 |
| 2005-2006                  | 0.69 (0.46 to 1.02)                                | 0.70 (0.44 to 1.11)                 | 55.9 (49.7 to 62.1)        | 56.7 (50.1 to 63.2)                 | 0.62 (0.45 to 0.85)                              | 0.64 (0.46 to 0.88)                 | 28.0 (23.2 to 32.8)        | 27.5 (22.7 to 32.3)                 |
| 2007-2008                  | 0.83 (0.55 to 1.24)                                | 0.79 (0.52 to 1.21)                 | 60.5 (54.4 to 66.6)        | 59.2 (54.0 to 64.5)                 | 0.88 (0.65 to 1.20)                              | 0.91 (0.65 to 1.29)                 | 35.7 (30.0 to 41.4)        | 35.2 (29.1 to 41.3)                 |
| 2009-2010                  | 0.83 (0.51 to 1.34)                                | 0.83 (0.50 to 1.39)                 | 59.3 (51.1 to 67.5)        | 61.0 (52.9 to 69.1)                 | 0.91 (0.59 to 1.40)                              | 0.95 (0.59 to 1.52)                 | 35.8 (27.0 to 44.7)        | 36.0 (26.6 to 45.4)                 |
| 2011-2012                  | 0.89 (0.58 to 1.35)                                | 0.92 (0.58 to 1.48)                 | 61.8 (55.4 to 68.3)        | 63.3 (56.5 to 70.0)                 | 1.44 (0.94 to 2.21)                              | 1.65 (1.07 to 2.54)                 | 48.5 (39.4 to 57.7)        | 49.5 (40.3 to 58.8)                 |
| 2013-2014                  | 0.64 (0.45 to 0.92)                                | 0.62 (0.41 to 0.96)                 | 53.3 (48.0 to 58.5)        | 53.9 (48.7 to 59.1)                 | 1.91 (1.35 to 2.69)                              | 2.00 (1.37 to 2.92)                 | 55.2 (48.2 to 62.3)        | 53.9 (46.3 to 61.6)                 |
| 2015-2016                  | 0.80 (0.54 to 1.19)                                | 0.79 (0.50 to 1.26)                 | 59.6 (53.7 to 65.4)        | 60.2 (54.1 to 66.3)                 | 1.72 (1.07 to 2.79)                              | 1.98 (1.24 to 3.16)                 | 53.7 (42.8 to 64.5)        | 54.4 (44.4 to 64.3)                 |
| <i>P</i> for trend         | .010                                               | .06                                 |                            |                                     | <.001                                            | <.001                               |                            |                                     |
| <b>Non-Hispanic black</b>  |                                                    |                                     |                            |                                     |                                                  |                                     |                            |                                     |
| 2001-2002                  | 1 [Reference]                                      | 1 [Reference]                       | 75.5 (69.8 to 81.2)        | 76.1 (69.4 to 82.8)                 | 1 [Reference]                                    | 1 [Reference]                       | 61.8 (56.7 to 66.9)        | 63.7 (57.1 to 70.3)                 |
| 2003-2004                  | 1.49 (1.07 to 2.09)                                | 1.37 (0.91 to 2.08)                 | 81.9 (79.4 to 84.5)        | 81.5 (78.7 to 84.3)                 | 0.61 (0.42 to 0.88)                              | 0.56 (0.38 to 0.83)                 | 49.1 (41.7 to 56.5)        | 49.4 (42.8 to 56.0)                 |
| 2005-2006                  | 1.14 (0.78 to 1.66)                                | 1.06 (0.68 to 1.65)                 | 77.4 (73.5 to 81.3)        | 77.3 (73.3 to 81.2)                 | 0.64 (0.43 to 0.95)                              | 0.54 (0.35 to 0.82)                 | 48.9 (41.1 to 56.6)        | 48.3 (40.4 to 56.2)                 |
| 2007-2008                  | 1.06 (0.70 to 1.62)                                | 0.96 (0.59 to 1.58)                 | 76.0 (70.6 to 81.4)        | 75.8 (69.9 to 81.6)                 | 1.08 (0.81 to 1.45)                              | 0.96 (0.67 to 1.37)                 | 63.2 (58.4 to 68.1)        | 62.4 (57.6 to 67.2)                 |
| 2009-2010                  | 0.94 (0.63 to 1.42)                                | 0.84 (0.52 to 1.38)                 | 73.3 (67.8 to 78.7)        | 72.8 (66.5 to 79.1)                 | 0.80 (0.56 to 1.16)                              | 0.75 (0.46 to 1.21)                 | 56.2 (47.9 to 64.5)        | 56.6 (47.0 to 66.1)                 |
| 2011-2012                  | 1.27 (0.78 to 2.09)                                | 1.30 (0.75 to 2.24)                 | 79.8 (72.8 to 86.8)        | 80.6 (74.5 to 86.7)                 | 0.92 (0.66 to 1.30)                              | 0.83 (0.57 to 1.19)                 | 58.5 (52.2 to 64.8)        | 59.2 (53.5 to 64.8)                 |
| 2013-2014                  | 0.74 (0.53 to 1.04)                                | 0.78 (0.52 to 1.19)                 | 69.1 (65.2 to 73.1)        | 71.2 (67.3 to 75.1)                 | 0.95 (0.67 to 1.35)                              | 0.88 (0.60 to 1.29)                 | 59.4 (53.1 to 65.8)        | 60.6 (54.7 to 66.5)                 |

|                    |                     |                     |                     |                     |                     |                     |                     |                     |
|--------------------|---------------------|---------------------|---------------------|---------------------|---------------------|---------------------|---------------------|---------------------|
| 2015-2016          | 1.05 (0.68 to 1.63) | 1.03 (0.64 to 1.66) | 75.8 (70.1 to 81.6) | 76.9 (71.7 to 82.0) | 1.57 (1.01 to 2.44) | 1.46 (0.89 to 2.39) | 71.4 (63.8 to 78.9) | 71.8 (63.9 to 79.8) |
| <i>P</i> for trend | .14                 | .27                 |                     |                     | .004                | .006                |                     |                     |
| <b>Hispanic</b>    |                     |                     |                     |                     |                     |                     |                     |                     |
| 2001-2002          | 1 [Reference]       | 1 [Reference]       | 63.3 (55.9 to 70.7) | 65.3 (56.6 to 74.0) | 1 [Reference]       | 1 [Reference]       | 36.4 (28.7 to 44.2) | 35.3 (27.7 to 43.0) |
| 2003-2004          | 1.57 (1.01 to 2.45) | 1.41 (0.86 to 2.31) | 72.5 (65.9 to 79.1) | 73.0 (66.9 to 79.0) | 0.84 (0.53 to 1.32) | 0.86 (0.52 to 1.42) | 31.8 (24.5 to 39.1) | 31.7 (23.2 to 40.3) |
| 2005-2006          | 1.16 (0.76 to 1.78) | 1.11 (0.69 to 1.80) | 68.2 (62.0 to 74.4) | 67.8 (61.5 to 74.2) | 0.63 (0.40 to 0.99) | 0.69 (0.44 to 1.09) | 26.8 (21.1 to 32.5) | 27.5 (21.5 to 33.5) |
| 2007-2008          | 1.04 (0.73 to 1.47) | 0.92 (0.60 to 1.41) | 63.6 (59.6 to 67.6) | 63.5 (58.9 to 68.0) | 1.00 (0.68 to 1.46) | 1.01 (0.66 to 1.55) | 36.7 (32.2 to 41.1) | 35.4 (29.3 to 41.5) |
| 2009-2010          | 0.86 (0.55 to 1.34) | 0.83 (0.50 to 1.39) | 60.7 (53.3 to 68.2) | 61.2 (53.0 to 69.5) | 0.80 (0.53 to 1.20) | 0.83 (0.55 to 1.25) | 31.8 (26.9 to 36.7) | 31.2 (25.9 to 36.6) |
| 2011-2012          | 0.96 (0.67 to 1.39) | 0.93 (0.59 to 1.47) | 62.5 (57.2 to 67.9) | 63.9 (58.1 to 69.6) | 0.95 (0.63 to 1.45) | 1.07 (0.69 to 1.65) | 35.9 (30.0 to 41.9) | 36.8 (30.3 to 43.4) |
| 2013-2014          | 0.99 (0.65 to 1.49) | 0.98 (0.59 to 1.65) | 63.3 (56.4 to 70.3) | 65.2 (57.3 to 73.2) | 1.67 (1.12 to 2.51) | 1.69 (1.14 to 2.52) | 49.5 (44.1 to 54.8) | 48.5 (43.2 to 53.7) |
| 2015-2016          | 1.03 (0.67 to 1.57) | 0.94 (0.55 to 1.63) | 64.5 (56.4 to 72.6) | 64.3 (55.1 to 73.4) | 1.77 (1.21 to 2.61) | 1.94 (1.24 to 3.03) | 52.1 (46.4 to 57.9) | 51.2 (43.7 to 58.8) |
| <i>P</i> for trend | .22                 | .27                 |                     |                     | <.001               | <.001               |                     |                     |

---

#### Adolescents 12-19 years

##### All<sup>a</sup>

|                    |                     |                     |                     |                     |                     |                     |                     |                     |
|--------------------|---------------------|---------------------|---------------------|---------------------|---------------------|---------------------|---------------------|---------------------|
| 2003-2004          | 1 [Reference]       | 1 [Reference]       | 64.5 (60.0 to 68.9) | 65.0 (60.8 to 69.2) | 1 [Reference]       | 1 [Reference]       | 52.6 (47.7 to 57.6) | 54.3 (48.9 to 59.6) |
| 2005-2006          | 0.75 (0.59 to 0.95) | 0.73 (0.59 to 0.90) | 57.5 (54.2 to 60.8) | 57.8 (54.6 to 61.0) | 1.09 (0.84 to 1.41) | 1.04 (0.78 to 1.38) | 54.7 (50.7 to 58.7) | 55.3 (51.2 to 59.5) |
| 2011-2012          | 0.96 (0.70 to 1.30) | 0.96 (0.71 to 1.29) | 62.4 (57.0 to 67.7) | 63.2 (57.8 to 68.7) | 1.51 (1.15 to 1.99) | 1.42 (1.07 to 1.89) | 61.6 (57.3 to 66.0) | 61.5 (57.3 to 65.7) |
| 2013-2014          | 0.86 (0.68 to 1.08) | 0.83 (0.67 to 1.02) | 60.5 (57.7 to 63.2) | 60.7 (57.9 to 63.5) | 1.60 (1.20 to 2.12) | 1.47 (1.06 to 2.02) | 63.3 (58.4 to 68.1) | 63.2 (58.0 to 68.3) |
| 2015-2016          | 0.81 (0.60 to 1.08) | 0.75 (0.58 to 0.97) | 58.6 (53.1 to 64.1) | 57.8 (52.6 to 63.0) | 1.22 (0.95 to 1.58) | 1.11 (0.84 to 1.47) | 57.0 (53.0 to 60.9) | 56.6 (52.2 to 61.0) |
| <i>P</i> for trend | .58                 | .29                 |                     |                     | .002                | .03                 |                     |                     |

##### Non-Hispanic white

|                    |                     |                     |                     |                     |                     |                     |                     |                     |
|--------------------|---------------------|---------------------|---------------------|---------------------|---------------------|---------------------|---------------------|---------------------|
| 2003-2004          | 1 [Reference]       | 1 [Reference]       | 62.6 (57.0 to 68.3) | 62.9 (57.3 to 68.4) | 1 [Reference]       | 1 [Reference]       | 55.0 (49.2 to 60.7) | 56.7 (50.5 to 62.8) |
| 2005-2006          | 0.69 (0.53 to 0.91) | 0.69 (0.52 to 0.91) | 53.7 (50.7 to 56.6) | 53.9 (50.8 to 57.0) | 1.10 (0.80 to 1.51) | 1.07 (0.75 to 1.51) | 57.3 (52.3 to 62.3) | 58.3 (52.5 to 64.1) |
| 2011-2012          | 0.92 (0.59 to 1.44) | 0.96 (0.62 to 1.50) | 59.5 (50.6 to 68.4) | 60.8 (51.9 to 69.7) | 1.36 (0.90 to 2.05) | 1.28 (0.85 to 1.91) | 60.9 (52.9 to 68.9) | 61.0 (53.0 to 69.0) |
| 2013-2014          | 0.82 (0.58 to 1.15) | 0.81 (0.59 to 1.12) | 57.2 (51.2 to 63.3) | 57.6 (52.0 to 63.3) | 1.48 (1.01 to 2.17) | 1.33 (0.88 to 2.02) | 63.4 (56.0 to 70.8) | 63.0 (54.9 to 71.0) |
| 2015-2016          | 0.74 (0.50 to 1.11) | 0.73 (0.48 to 1.10) | 53.9 (46.1 to 61.7) | 54.0 (45.9 to 62.0) | 1.04 (0.74 to 1.48) | 0.95 (0.67 to 1.37) | 55.0 (48.9 to 61.1) | 54.9 (48.7 to 61.1) |
| <i>P</i> for trend | .51                 | .51                 |                     |                     | .18                 | .67                 |                     |                     |

##### Non-Hispanic black

|                    |                     |                     |                     |                     |                     |                     |                     |                     |
|--------------------|---------------------|---------------------|---------------------|---------------------|---------------------|---------------------|---------------------|---------------------|
| 2003-2004          | 1 [Reference]       | 1 [Reference]       | 72.9 (68.1 to 77.7) | 73.4 (68.5 to 78.3) | 1 [Reference]       | 1 [Reference]       | 48.7 (43.3 to 54.2) | 49.7 (42.9 to 56.5) |
| 2005-2006          | 1.08 (0.76 to 1.53) | 1.07 (0.75 to 1.54) | 74.4 (69.8 to 79.0) | 74.8 (70.0 to 79.5) | 1.24 (0.77 to 2.00) | 1.22 (0.73 to 2.05) | 54.1 (43.8 to 64.4) | 54.7 (44.3 to 65.1) |
| 2011-2012          | 0.92 (0.65 to 1.30) | 0.92 (0.66 to 1.29) | 70.4 (65.2 to 75.6) | 70.8 (65.8 to 75.7) | 2.69 (1.74 to 4.15) | 2.44 (1.59 to 3.73) | 71.6 (63.9 to 79.2) | 70.2 (63.3 to 77.0) |
| 2013-2014          | 0.81 (0.57 to 1.16) | 0.81 (0.56 to 1.18) | 69.1 (64.5 to 73.6) | 69.7 (64.9 to 74.5) | 1.79 (1.29 to 2.47) | 1.75 (1.21 to 2.53) | 62.0 (57.0 to 66.9) | 62.6 (57.4 to 67.8) |
| 2015-2016          | 0.77 (0.53 to 1.11) | 0.72 (0.51 to 1.02) | 67.3 (61.0 to 73.7) | 66.5 (60.9 to 72.1) | 1.32 (0.91 to 1.92) | 1.23 (0.81 to 1.89) | 55.6 (47.9 to 63.3) | 55.1 (47.1 to 63.2) |
| <i>P</i> for trend | .046                | .027                |                     |                     | .008                | .037                |                     |                     |

##### Hispanic

|                    |                     |                     |                     |                     |                     |                     |                     |                     |
|--------------------|---------------------|---------------------|---------------------|---------------------|---------------------|---------------------|---------------------|---------------------|
| 2003-2004          | 1 [Reference]       | 1 [Reference]       | 66.2 (59.4 to 73.0) | 66.9 (59.7 to 74.1) | 1 [Reference]       | 1 [Reference]       | 41.6 (34.6 to 48.7) | 42.9 (35.4 to 50.4) |
| 2005-2006          | 0.77 (0.50 to 1.18) | 0.72 (0.47 to 1.10) | 60.1 (53.1 to 67.1) | 59.3 (52.8 to 65.8) | 0.92 (0.60 to 1.42) | 0.83 (0.52 to 1.30) | 39.7 (32.4 to 47.0) | 38.3 (30.3 to 46.2) |
| 2011-2012          | 1.07 (0.68 to 1.67) | 1.07 (0.66 to 1.73) | 66.9 (60.0 to 73.8) | 67.8 (60.6 to 75.1) | 1.53 (1.06 to 2.20) | 1.44 (0.96 to 2.15) | 52.1 (46.5 to 57.6) | 51.7 (45.1 to 58.4) |
| 2013-2014          | 0.94 (0.66 to 1.36) | 0.94 (0.62 to 1.43) | 65.5 (62.0 to 69.0) | 66.4 (61.4 to 71.4) | 2.23 (1.56 to 3.21) | 2.23 (1.55 to 3.19) | 61.5 (56.3 to 66.8) | 62.7 (57.9 to 67.5) |
| 2015-2016          | 0.86 (0.58 to 1.26) | 0.78 (0.52 to 1.16) | 62.9 (57.6 to 68.1) | 61.7 (56.0 to 67.4) | 1.82 (1.23 to 2.68) | 1.73 (1.12 to 2.66) | 55.6 (49.9 to 61.4) | 55.9 (48.8 to 63.1) |
| <i>P</i> for trend | .94                 | .93                 |                     |                     | <.001               | <.001               |                     |                     |

---

**Adults ≥20 years**

**All<sup>c</sup>**

|                    |                     |                     |                     |                     |                     |                     |                     |                     |
|--------------------|---------------------|---------------------|---------------------|---------------------|---------------------|---------------------|---------------------|---------------------|
| 2003-2004          | 1 [Reference]       | 1 [Reference]       | 65.2 (62.3 to 68.1) | 65.2 (62.2 to 68.3) | 1 [Reference]       | 1 [Reference]       | 28.5 (26.4 to 30.5) | 28.3 (26.0 to 30.6) |
| 2005-2006          | 0.97 (0.83 to 1.14) | 0.98 (0.84 to 1.14) | 64.6 (62.5 to 66.7) | 64.8 (62.9 to 66.7) | 1.15 (0.97 to 1.37) | 1.13 (0.95 to 1.33) | 31.4 (28.5 to 34.4) | 30.8 (28.2 to 33.5) |
| 2011-2012          | 1.09 (0.91 to 1.30) | 1.13 (0.96 to 1.33) | 67.1 (64.5 to 69.6) | 67.6 (65.5 to 69.8) | 2.57 (2.14 to 3.09) | 2.62 (2.20 to 3.11) | 50.2 (46.3 to 54.0) | 50.3 (47.0 to 53.5) |
| 2013-2014          | 1.04 (0.89 to 1.21) | 1.09 (0.94 to 1.27) | 66.0 (64.1 to 67.9) | 66.7 (65.1 to 68.4) | 2.42 (2.08 to 2.82) | 2.41 (2.10 to 2.77) | 48.9 (46.2 to 51.6) | 48.4 (46.2 to 50.5) |
| 2015-2016          | 1.00 (0.82 to 1.23) | 1.08 (0.88 to 1.33) | 65.2 (61.7 to 68.8) | 66.5 (63.0 to 70.1) | 2.59 (2.24 to 3.00) | 2.54 (2.17 to 2.97) | 49.9 (47.4 to 52.3) | 48.8 (46.2 to 51.4) |
| <i>P</i> for trend | .56                 | .12                 |                     |                     | <.001               | <.001               |                     |                     |

**Non-Hispanic white**

|                    |                     |                     |                     |                     |                     |                     |                     |                     |
|--------------------|---------------------|---------------------|---------------------|---------------------|---------------------|---------------------|---------------------|---------------------|
| 2003-2004          | 1 [Reference]       | 1 [Reference]       | 64.5 (61.3 to 67.7) | 64.1 (60.6 to 67.7) | 1 [Reference]       | 1 [Reference]       | 30.4 (27.6 to 33.1) | 30.8 (27.8 to 33.7) |
| 2005-2006          | 0.98 (0.82 to 1.16) | 1.00 (0.83 to 1.20) | 64.0 (61.8 to 66.2) | 64.1 (61.9 to 66.3) | 1.12 (0.90 to 1.39) | 1.08 (0.88 to 1.33) | 32.8 (29.0 to 36.6) | 32.5 (29.2 to 35.8) |
| 2011-2012          | 1.13 (0.92 to 1.38) | 1.16 (0.95 to 1.42) | 67.1 (64.0 to 70.3) | 67.6 (64.8 to 70.3) | 2.45 (1.90 to 3.16) | 2.39 (1.88 to 3.03) | 51.2 (45.7 to 56.7) | 51.2 (46.4 to 56.0) |
| 2013-2014          | 1.13 (0.93 to 1.37) | 1.19 (0.98 to 1.44) | 67.3 (64.4 to 70.1) | 67.9 (65.4 to 70.4) | 2.39 (1.99 to 2.86) | 2.28 (1.90 to 2.74) | 50.6 (47.6 to 53.7) | 50.1 (47.3 to 53.0) |
| 2015-2016          | 1.11 (0.86 to 1.44) | 1.22 (0.92 to 1.62) | 66.8 (62.1 to 71.5) | 68.3 (63.3 to 73.4) | 2.70 (2.18 to 3.34) | 2.54 (2.06 to 3.13) | 52.8 (48.7 to 57.0) | 51.9 (48.1 to 55.7) |
| <i>P</i> for trend | .11                 | .02                 |                     |                     | <.001               | <.001               |                     |                     |

**Non-Hispanic black**

|                    |                     |                     |                     |                     |                     |                     |                     |                     |
|--------------------|---------------------|---------------------|---------------------|---------------------|---------------------|---------------------|---------------------|---------------------|
| 2003-2004          | 1 [Reference]       | 1 [Reference]       | 73.6 (68.4 to 78.8) | 76.0 (71.6 to 80.4) | 1 [Reference]       | 1 [Reference]       | 28.0 (24.7 to 31.3) | 27.9 (24.9 to 30.9) |
| 2005-2006          | 1.12 (0.74 to 1.70) | 1.04 (0.70 to 1.55) | 75.8 (70.3 to 81.4) | 76.8 (71.2 to 82.3) | 1.39 (1.07 to 1.80) | 1.34 (1.06 to 1.69) | 35.0 (30.5 to 39.6) | 34.2 (30.3 to 38.1) |
| 2011-2012          | 1.19 (0.84 to 1.69) | 1.10 (0.79 to 1.53) | 76.8 (72.9 to 80.7) | 77.5 (74.0 to 81.1) | 2.96 (2.38 to 3.69) | 2.87 (2.37 to 3.47) | 53.4 (49.2 to 57.6) | 52.3 (49.0 to 55.6) |
| 2013-2014          | 1.10 (0.77 to 1.58) | 1.00 (0.71 to 1.41) | 75.5 (71.3 to 79.7) | 75.9 (71.6 to 80.1) | 2.56 (2.03 to 3.24) | 2.54 (1.92 to 3.36) | 49.8 (45.1 to 54.4) | 49.5 (43.2 to 55.7) |
| 2015-2016          | 0.98 (0.70 to 1.35) | 0.87 (0.65 to 1.17) | 73.2 (69.7 to 76.6) | 73.5 (70.3 to 76.7) | 2.83 (2.11 to 3.77) | 2.61 (1.99 to 3.41) | 51.8 (45.9 to 57.7) | 50.0 (44.4 to 55.5) |
| <i>P</i> for trend | .97                 | .50                 |                     |                     | <.001               | <.001               |                     |                     |

**Hispanic**

|                    |                     |                     |                     |                     |                     |                     |                     |                     |
|--------------------|---------------------|---------------------|---------------------|---------------------|---------------------|---------------------|---------------------|---------------------|
| 2003-2004          | 1 [Reference]       | 1 [Reference]       | 65.7 (62.5 to 68.9) | 66.1 (63.3 to 69.0) | 1 [Reference]       | 1 [Reference]       | 16.7 (13.4 to 20.1) | 14.8 (11.5 to 18.1) |
| 2005-2006          | 0.75 (0.59 to 0.97) | 0.76 (0.60 to 0.97) | 59.1 (54.2 to 63.9) | 59.9 (55.0 to 64.7) | 0.92 (0.64 to 1.32) | 1.00 (0.70 to 1.45) | 15.6 (12.1 to 19.1) | 14.9 (11.7 to 18.1) |
| 2011-2012          | 0.87 (0.71 to 1.07) | 0.91 (0.76 to 1.10) | 62.6 (59.4 to 65.9) | 63.7 (60.8 to 66.6) | 3.00 (2.21 to 4.08) | 3.34 (2.43 to 4.59) | 37.5 (33.4 to 41.5) | 36.7 (33.1 to 40.4) |
| 2013-2014          | 0.82 (0.68 to 1.00) | 0.83 (0.68 to 1.02) | 61.2 (58.4 to 64.0) | 62.0 (58.5 to 65.4) | 3.13 (2.31 to 4.26) | 3.18 (2.28 to 4.43) | 39.0 (34.9 to 43.1) | 36.1 (31.8 to 40.4) |
| 2015-2016          | 0.74 (0.59 to 0.93) | 0.75 (0.61 to 0.92) | 58.7 (54.5 to 62.8) | 59.2 (55.1 to 63.4) | 2.80 (2.06 to 3.80) | 2.78 (2.07 to 3.73) | 35.7 (31.6 to 39.9) | 32.3 (29.6 to 35.1) |
| <i>P</i> for trend | .13                 | .16                 |                     |                     | <.001               | <.001               |                     |                     |

---

---

<sup>a</sup> Among children 5-11 years, adolescents 12-19 years, and adults  $\geq 20$  years old. All estimates were weighted to be nationally representative.

<sup>b</sup> Multivariable adjusted models included age (continuous), sex, weight status, race/ethnicity (in all races and ethnicities models only), household income and leisure-time physical activity, and education attainment and smoking status (adults  $\geq 20$  years only).

<sup>c</sup> Includes other race/ethnic groups not shown separately.

**eTable 6. Estimated Prevalence of Sitting Watching Television or Videos ( $\geq 2$  h/d) in the US Population by Sociodemographic and Lifestyle Characteristics, NHANES 2015-2016<sup>a</sup>**

|                                             | Sitting Watching Television or Videos $\geq 2$ h/d, % (95% CI) |                     |                     |
|---------------------------------------------|----------------------------------------------------------------|---------------------|---------------------|
|                                             | 5-11 years                                                     | 12-19 years         | $\geq 20$ years     |
| Overall                                     | 62.2 (57.1 to 67.2)                                            | 59.4 (53.7 to 65.0) | 65.1 (61.4 to 68.8) |
| Sex                                         |                                                                |                     |                     |
| Female                                      | 61.1 (55.5 to 66.8)                                            | 59.9 (52.8 to 66.9) | 63.9 (59.8 to 67.9) |
| Male                                        | 63.1 (56.1 to 70.1)                                            | 58.9 (52.0 to 65.9) | 66.3 (62.2 to 70.4) |
| Race/ethnicity                              |                                                                |                     |                     |
| Non-Hispanic white                          | 59.1 (52.7 to 65.5)                                            | 55.3 (46.9 to 63.8) | 66.5 (61.3 to 71.6) |
| Non-Hispanic black                          | 75.3 (68.6 to 81.9)                                            | 67.7 (61.3 to 74.2) | 73.3 (69.7 to 76.8) |
| Hispanic                                    | 63.8 (56.2 to 71.3)                                            | 62.8 (57.0 to 68.6) | 58.7 (54.6 to 62.8) |
| Other <sup>b</sup>                          | 55.3 (42.7 to 67.8)                                            | 59.9 (46.7 to 73.0) | 56.8 (51.6 to 61.9) |
| Annual household income                     |                                                                |                     |                     |
| <\$25,000                                   | 70.0 (63.1 to 76.9)                                            | 62.8 (55.6 to 69.9) | 65.0 (58.3 to 71.7) |
| \$25,000-<\$75,000                          | 68.2 (62.9 to 73.5)                                            | 62.9 (56.6 to 69.2) | 70.3 (67.1 to 73.4) |
| $\geq$ \$75,000                             | 52.9 (45.4 to 60.3)                                            | 53.6 (45.3 to 61.9) | 61.3 (54.9 to 67.7) |
| Weight status <sup>c</sup>                  |                                                                |                     |                     |
| Normal                                      | 60.3 (54.9 to 65.7)                                            | 53.7 (47.6 to 59.8) | 59.0 (53.3 to 64.8) |
| Overweight                                  | 62.9 (51.3 to 74.5)                                            | 63.7 (56.2 to 71.1) | 64.6 (57.7 to 71.5) |
| Obese                                       | 72.7 (65.7 to 79.7)                                            | 67.8 (60.4 to 75.1) | 71.2 (67.7 to 74.8) |
| Leisure-time physical activity <sup>d</sup> |                                                                |                     |                     |
| Active                                      | 58.4 (51.1 to 65.7)                                            | 57.6 (51.6 to 63.6) | 60.7 (56.7 to 64.7) |
| Inactive                                    | 67.0 (60.9 to 73.0)                                            | 66.3 (57.1 to 75.6) | 71.7 (67.4 to 76.1) |
| Educational attainment <sup>e</sup>         |                                                                |                     |                     |
| <High school                                |                                                                |                     | 62.2 (53.8 to 70.6) |
| High school                                 |                                                                |                     | 74.5 (68.8 to 80.3) |
| >High school                                |                                                                |                     | 62.8 (58.9 to 66.8) |
| Smoking status <sup>e</sup>                 |                                                                |                     |                     |
| Never                                       |                                                                |                     | 61.9 (57.6 to 66.2) |
| Former                                      |                                                                |                     | 69.3 (63.3 to 75.2) |
| Current                                     |                                                                |                     | 70.3 (65.8 to 74.9) |

<sup>a</sup> Participant characteristics were presented according to age group: 5-11 years, 12-19 years,  $\geq 20$  years. All estimates were weighted to be nationally representative.

<sup>b</sup> "Other" includes race/ethnicity other than non-Hispanic white, Non-Hispanic black, or Hispanic, including multiracial.

<sup>c</sup> For weight status definition, see the Methods section.

<sup>d</sup> For leisure-time physical activity definition, see the Methods section.

<sup>e</sup> Information on educational attainment and smoking status was collected only among participants 20 years or older.

**eTable 7. Weighted Logistic Regression Models of Screen-based Sedentary Behaviors, NHANES 2015-2016<sup>a</sup>**

|                                             | Odds Ratio (95% CI)                           |               |               |                                             |                     |                     |
|---------------------------------------------|-----------------------------------------------|---------------|---------------|---------------------------------------------|---------------------|---------------------|
|                                             | Sitting Watching Television or Videos ≥ 2 h/d |               |               | Computer Use Outside School or Work ≥ 1 h/d |                     |                     |
|                                             | 5-11 years                                    | 12-19 years   | ≥20 years     | 5-11 years                                  | 12-19 years         | ≥20 years           |
| Age                                         | 1.00 (0.92 to                                 | 1.04 (0.95 to | 1.03 (1.02 to | 1.13 (1.05 to                               | 1.04 (0.93 to 1.15) | 0.99 (0.98 to 0.99) |
| Sex                                         |                                               |               |               |                                             |                     |                     |
| Female                                      | 1 [Reference]                                 | 1 [Reference] | 1 [Reference] | 1 [Reference]                               | 1 [Reference]       | 1 [Reference]       |
| Male                                        | 1.22 (0.84 to                                 | 1.00 (0.70 to | 1.13 (0.95 to | 2.40 (1.82 to                               | 2.11 (1.57 to 2.84) | 0.95 (0.77 to 1.18) |
| Race/ethnicity                              |                                               |               |               |                                             |                     |                     |
| Non-Hispanic white                          | 1 [Reference]                                 | 1 [Reference] | 1 [Reference] | 1 [Reference]                               | 1 [Reference]       | 1 [Reference]       |
| Non-Hispanic black                          | 1.82 (1.13 to                                 | 1.39 (0.89 to | 1.36 (1.00 to | 1.89 (1.07 to                               | 0.96 (0.61 to 1.52) | 0.96 (0.73 to 1.26) |
| Hispanic                                    | 0.99 (0.61 to                                 | 1.10 (0.67 to | 0.76 (0.57 to | 0.78 (0.48 to                               | 1.01 (0.67 to 1.50) | 0.60 (0.47 to 0.78) |
| Other <sup>b</sup>                          | 0.99 (0.62 to                                 | 1.18 (0.68 to | 0.77 (0.56 to | 1.58 (0.77 to                               | 2.01 (1.14 to 3.57) | 1.01 (0.82 to 1.24) |
| Annual household income <sup>e</sup>        |                                               |               |               |                                             |                     |                     |
| <\$25,000                                   | 1 [Reference]                                 | 1 [Reference] | 1 [Reference] | 1 [Reference]                               | 1 [Reference]       | 1 [Reference]       |
| \$25,000-<\$75,000                          | 0.89 (0.57 to                                 | 1.11 (0.80 to | 1.34 (1.00 to | 0.88 (0.67 to                               | 0.96 (0.68 to 1.34) | 1.27 (0.92 to 1.76) |
| ≥\$75,000                                   | 0.50 (0.31 to                                 | 0.82 (0.55 to | 0.95 (0.63 to | 0.54 (0.31 to                               | 1.21 (0.83 to 1.76) | 1.11 (0.82 to 1.50) |
| <i>P</i> for trend <sup>c</sup>             | .002                                          | .18           | .48           | .16                                         | .15                 | .97                 |
| Weight status <sup>d</sup>                  |                                               |               |               |                                             |                     |                     |
| Normal                                      | 1 [Reference]                                 | 1 [Reference] | 1 [Reference] | 1 [Reference]                               | 1 [Reference]       | 1 [Reference]       |
| Overweight                                  | 1.01 (0.63 to                                 | 1.58 (1.21 to | 1.09 (0.87 to | 0.97 (0.63 to                               | 0.97 (0.56 to 1.69) | 1.01 (0.78 to 1.31) |
| Obese                                       | 1.47 (0.96 to                                 | 1.62 (1.15 to | 1.54 (1.23 to | 1.04 (0.75 to                               | 1.33 (0.99 to 1.81) | 1.24 (0.94 to 1.66) |
| <i>P</i> for trend <sup>e</sup>             | .14                                           | .02           | .001          | .34                                         | .13                 | .04                 |
| Leisure-time physical activity <sup>f</sup> |                                               |               |               |                                             |                     |                     |
| Active                                      | 1 [Reference]                                 | 1 [Reference] | 1 [Reference] | 1 [Reference]                               | 1 [Reference]       | 1 [Reference]       |
| Inactive                                    | 1.57 (1.03 to                                 | 1.33 (0.80 to | 1.44 (1.20 to | 1.40 (1.05 to                               | 1.62 (1.07 to 2.46) | 0.94 (0.80 to 1.10) |
| Educational attainment <sup>g</sup>         |                                               |               |               |                                             |                     |                     |
| <High school                                |                                               |               | 1 [Reference] |                                             |                     | 1 [Reference]       |
| High school                                 |                                               |               | 1.65 (1.16 to |                                             |                     | 2.03 (1.74 to 2.37) |
| >High school                                |                                               |               | 1.11 (0.71 to |                                             |                     | 2.58 (1.93 to 3.44) |
| Smoking status <sup>g</sup>                 |                                               |               |               |                                             |                     |                     |
| Never                                       |                                               |               | 1 [Reference] |                                             |                     | 1 [Reference]       |
| Former                                      |                                               |               | 0.99 (0.71 to |                                             |                     | 1.30 (1.01 to 1.68) |
| Current                                     |                                               |               | 1.30 (0.96 to |                                             |                     | 1.00 (0.77 to 1.31) |

---

<sup>a</sup> Participant characteristics are presented by age group:  $\geq 20$  years, 12-19 years and 5-11 years old. All estimates were weighted to be nationally representative.

<sup>b</sup> "Other" includes race/ethnicity other than non-Hispanic white, non-Hispanic black, or Hispanic, including multiracial.

<sup>c</sup> Calculated as tests for trend using the median value of each category as a continuous variable.

<sup>d</sup> For weight status definition, see the Methods section.

<sup>e</sup> *P* for trend was calculated using continuous BMI.

<sup>f</sup> For leisure-time physical activity definition, see the Methods section.

<sup>g</sup> Information on educational attainment and smoking status was collected only among participants 20 years or older.

**eTable 8. Weighted Association of Survey Cycle and Total Sitting Time (h/d) Among US Adults and Adolescents Overall and According to Race/Ethnicity, NHANES 2007-2016<sup>a</sup>**

|                           | 12 to 19 years                   |                                     |                            |                                     | 20 years and older               |                                     |                            |                                     |
|---------------------------|----------------------------------|-------------------------------------|----------------------------|-------------------------------------|----------------------------------|-------------------------------------|----------------------------|-------------------------------------|
|                           | Regression Coefficients (95% CI) |                                     | Predicted Margins (95% CI) |                                     | Regression Coefficients (95% CI) |                                     | Predicted Margins (95% CI) |                                     |
|                           | Age-adjusted                     | Multivariable-Adjusted <sup>b</sup> | Age-adjusted               | Multivariable-Adjusted <sup>b</sup> | Age-Adjusted                     | Multivariable-Adjusted <sup>b</sup> | Age-adjusted               | Multivariable-Adjusted <sup>b</sup> |
| <b>All<sup>c</sup></b>    |                                  |                                     |                            |                                     |                                  |                                     |                            |                                     |
| 2007-2008                 | 0.0 [Reference]                  | 0.0 [Reference]                     | 7.1 (6.8 to 7.4)           | 7.2 (6.8 to 7.5)                    | 0.0 [Reference]                  | 0.0 [Reference]                     | 5.5 (5.2 to 5.7)           | 5.6 (5.4 to 5.8)                    |
| 2009-2010                 | 0.1 (-0.4 to 0.6)                | 0.1 (-0.5 to 0.7)                   | 7.2 (6.8 to 7.6)           | 7.3 (6.8 to 7.7)                    | 0.2 (-0.1 to 0.4)                | 0.1 (-0.2 to 0.3)                   | 5.6 (5.5 to 5.8)           | 5.7 (5.5 to 5.8)                    |
| 2011-2012                 | 0.9 (0.4 to 1.3)                 | 0.8 (0.4 to 1.3)                    | 7.9 (7.6 to 8.3)           | 8.0 (7.6 to 8.4)                    | 0.7 (0.4 to 1.1)                 | 0.6 (0.4 to 0.9)                    | 6.2 (6.0 to 6.4)           | 6.2 (6.1 to 6.4)                    |
| 2013-2014                 | 1.3 (0.8 to 1.7)                 | 1.2 (0.8 to 1.7)                    | 8.4 (8.1 to 8.7)           | 8.4 (8.1 to 8.7)                    | 1.5 (1.2 to 1.8)                 | 1.4 (1.1 to 1.6)                    | 7.0 (6.8 to 7.2)           | 7.0 (6.8 to 7.2)                    |
| 2015-2016                 | 1.1 (0.7 to 1.4)                 | 1.0 (0.6 to 1.4)                    | 8.1 (7.9 to 8.4)           | 8.2 (7.9 to 8.4)                    | 1.0 (0.7 to 1.3)                 | 0.8 (0.5 to 1.1)                    | 6.4 (6.2 to 6.6)           | 6.4 (6.2 to 6.6)                    |
| <i>P</i> for trend        | <.001                            | <.001                               |                            |                                     | <.001                            | <.001                               |                            |                                     |
| <b>Non-Hispanic White</b> |                                  |                                     |                            |                                     |                                  |                                     |                            |                                     |
| 2007-2008                 | 0.0 [Reference]                  | 0.0 [Reference]                     | 7.2 (6.8 to 7.6)           | 7.3 (6.8 to 7.7)                    | 0.0 [Reference]                  | 0.0 [Reference]                     | 5.8 (5.4 to 6.1)           | 5.9 (5.7 to 6.2)                    |
| 2009-2010                 | -0.1 (-0.8 to 0.6)               | -0.1 (-0.8 to 0.7)                  | 7.1 (6.6 to 7.7)           | 7.2 (6.6 to 7.9)                    | 0.2 (-0.2 to 0.6)                | 0 (-0.3 to 0.4)                     | 6.0 (5.7 to 6.2)           | 6.0 (5.7 to 6.2)                    |
| 2011-2012                 | 0.8 (0.1 to 1.5)                 | 0.8 (0.1 to 1.5)                    | 8.0 (7.4 to 8.6)           | 8.1 (7.5 to 8.6)                    | 0.8 (0.4 to 1.2)                 | 0.6 (0.2 to 0.9)                    | 6.5 (6.3 to 6.7)           | 6.5 (6.3 to 6.7)                    |
| 2013-2014                 | 0.9 (0.3 to 1.6)                 | 0.9 (0.2 to 1.6)                    | 8.1 (7.6 to 8.7)           | 8.2 (7.7 to 8.7)                    | 1.4 (1.0 to 1.8)                 | 1.2 (0.8 to 1.6)                    | 7.2 (6.9 to 7.4)           | 7.1 (6.9 to 7.3)                    |
| 2015-2016                 | 0.8 (0.3 to 1.4)                 | 0.8 (0.2 to 1.3)                    | 8.0 (7.7 to 8.4)           | 8.0 (7.7 to 8.4)                    | 1.0 (0.6 to 1.4)                 | 0.8 (0.4 to 1.2)                    | 6.8 (6.5 to 7.1)           | 6.7 (6.4 to 7.0)                    |
| <i>P</i> for trend        | <.001                            | <.001                               |                            |                                     | <.001                            | <.001                               |                            |                                     |
| <b>Non-Hispanic Black</b> |                                  |                                     |                            |                                     |                                  |                                     |                            |                                     |
| 2007-2008                 | 0.0 [Reference]                  | 0.0 [Reference]                     | 7.0 (6.3 to 7.7)           | 7.0 (6.4 to 7.5)                    | 0.0 [Reference]                  | 0.0 [Reference]                     | 5.3 (4.9 to 5.7)           | 5.3 (5.0 to 5.7)                    |
| 2009-2010                 | 0.2 (-0.6 to 1.0)                | 0.2 (-0.6 to 1.0)                   | 7.2 (6.7 to 7.6)           | 7.2 (6.7 to 7.7)                    | -0.1 (-0.7 to 0.4)               | -0.1 (-0.6 to 0.4)                  | 5.2 (4.8 to 5.5)           | 5.2 (4.8 to 5.6)                    |
| 2011-2012                 | 0.9 (0.1 to 1.7)                 | 1.0 (0.3 to 1.6)                    | 7.9 (7.5 to 8.2)           | 7.9 (7.6 to 8.2)                    | 1.0 (0.3 to 1.7)                 | 0.9 (0.3 to 1.5)                    | 6.3 (5.7 to 6.9)           | 6.2 (5.7 to 6.7)                    |
| 2013-2014                 | 1.9 (1.2 to 2.6)                 | 1.8 (1.2 to 2.4)                    | 8.8 (8.7 to 9.0)           | 8.8 (8.7 to 9.0)                    | 2.2 (1.6 to 2.7)                 | 2.2 (1.7 to 2.7)                    | 7.4 (7.1 to 7.8)           | 7.5 (7.2 to 7.8)                    |
| 2015-2016                 | 1.3 (0.5 to 2.2)                 | 1.3 (0.5 to 2.2)                    | 8.3 (7.8 to 8.8)           | 8.3 (7.7 to 8.9)                    | 0.9 (0.4 to 1.4)                 | 0.9 (0.4 to 1.4)                    | 6.2 (5.9 to 6.5)           | 6.2 (5.9 to 6.5)                    |
| <i>P</i> for trend        | <.001                            | <.001                               |                            |                                     | <.001                            | <.001                               |                            |                                     |
| <b>Hispanic</b>           |                                  |                                     |                            |                                     |                                  |                                     |                            |                                     |
| 2007-2008                 | 0.0 [Reference]                  | 0.0 [Reference]                     | 6.7 (6.2 to 7.2)           | 6.7 (6.3 to 7.2)                    | 0.0 [Reference]                  | 0.0 [Reference]                     | 4.1 (3.8 to 4.4)           | 4.2 (3.9 to 4.5)                    |
| 2009-2010                 | 0.6 (-0.1 to 1.2)                | 0.5 (0.0 to 1.1)                    | 7.3 (6.9 to 7.6)           | 7.3 (6.9 to 7.6)                    | 0.0 (-0.4 to 0.4)                | 0.1 (-0.3 to 0.5)                   | 4.1 (3.9 to 4.3)           | 4.3 (4.0 to 4.6)                    |
| 2011-2012                 | 0.9 (0.3 to 1.6)                 | 0.9 (0.3 to 1.5)                    | 7.7 (7.3 to 8.0)           | 7.6 (7.3 to 8.0)                    | 0.6 (0.1 to 1.0)                 | 0.6 (0.2 to 0.9)                    | 4.7 (4.4 to 5.0)           | 4.8 (4.5 to 5.1)                    |
| 2013-2014                 | 1.7 (1.1 to 2.3)                 | 1.6 (1.1 to 2.2)                    | 8.4 (8.1 to 8.7)           | 8.4 (8.1 to 8.7)                    | 1.8 (1.4 to 2.2)                 | 1.5 (1.1 to 1.9)                    | 5.9 (5.6 to 6.2)           | 5.8 (5.5 to 6.1)                    |
| 2015-2016                 | 1.4 (0.8 to 2.0)                 | 1.4 (0.8 to 2.0)                    | 8.1 (7.8 to 8.4)           | 8.2 (7.8 to 8.5)                    | 1.1 (0.7 to 1.5)                 | 1.0 (0.6 to 1.3)                    | 5.2 (4.9 to 5.5)           | 5.2 (4.9 to 5.4)                    |
| <i>P</i> for trend        | <.001                            | <.001                               |                            |                                     | <.001                            | <.001                               |                            |                                     |

<sup>a</sup> Participants characteristics are presented by age group: adolescents 12-19 years, ≥ 20 years. All estimates were weighted to be nationally representative.

<sup>b</sup> Multivariable adjusted models included age (continuous), sex, weight status, race/ethnicity (in all races and ethnicities models only), household income, leisure-time physical activity, and educational attainment and smoking status (adults ≥ 20 years only).

<sup>c</sup> Includes "other" race/ethnic groups not shown separately.

**eTable 9. Weighted Linear Regression Models of Total Sitting Time (h/d) Among Adults and Adolescents on Survey Cycle, NHANES 2007-2016<sup>a</sup>**

|                                             | Regression Coefficient (95% CI) |                        |
|---------------------------------------------|---------------------------------|------------------------|
|                                             | 12-19 years                     | ≥20 years              |
| Age                                         | -0.34 (-0.38 to -0.30)          | -0.01 (-0.01 to 0.00)  |
| Sex                                         |                                 |                        |
| Female                                      | 0 [Reference]                   | 0 [Reference]          |
| Male                                        | -0.41 (-0.61 to -0.21)          | 0.12 (0.00 to 0.25)    |
| Race/ethnicity                              |                                 |                        |
| Non-Hispanic white                          | 0 [Reference]                   | 0 [Reference]          |
| Non-Hispanic black                          | 0.08 (-0.17 to 0.34)            | -0.10 (-0.29 to 0.09)  |
| Hispanic                                    | -0.13 (-0.39 to 0.14)           | -1.12 (-1.30 to -0.94) |
| Other <sup>b</sup>                          | 0.54 (0.14 to 0.94)             | 0.02 (-0.17 to 0.20)   |
| Annual household income                     |                                 |                        |
| <\$25,000                                   | 0 [Reference]                   | 0 [Reference]          |
| \$25,000-<\$75,000                          | 0.24 (0.01 to 0.47)             | 0.19 (0.05 to 0.33)    |
| ≥\$75,000                                   | 0.28 (-0.01 to 0.57)            | 0.84 (0.68 to 0.99)    |
| <i>P</i> for trend <sup>c</sup>             | .02                             | <.001                  |
| Weight status <sup>d</sup>                  |                                 |                        |
| Normal                                      | 0 [Reference]                   | 0 [Reference]          |
| Overweight                                  | -0.08 (-0.28 to 0.11)           | 0.28 (0.13 to 0.44)    |
| Obese                                       | 0.51 (0.26 to 0.76)             | 0.65 (0.49 to 0.81)    |
| <i>P</i> for trend <sup>e</sup>             | <.001                           | <.001                  |
| Leisure-time physical activity <sup>f</sup> |                                 |                        |
| Active                                      | 0 [Reference]                   | 0 [Reference]          |
| Inactive                                    | 0.38 (0.13 to 0.62)             | 0.24 (0.12 to 0.37)    |
| Educational attainment <sup>g</sup>         |                                 |                        |
| <High school                                |                                 | 0 [Reference]          |
| High school                                 |                                 | 0.44 (0.27 to 0.61)    |
| >High school                                |                                 | 1.30 (1.14 to 1.46)    |
| Smoking status <sup>g</sup>                 |                                 |                        |
| Never                                       |                                 | 0 [Reference]          |
| Former                                      |                                 | 0.13 (-0.03 to 0.29)   |
| Current                                     |                                 | -0.12 (-0.30 to 0.06)  |
| Cycle                                       |                                 |                        |
| 2007-2008                                   | 0 [Reference]                   | 0 [Reference]          |
| 2009-2010                                   | 0.10 (-0.47 to 0.66)            | 0.06 (-0.19 to 0.32)   |
| 2011-2012                                   | 0.83 (0.34 to 1.33)             | 0.61 (0.35 to 0.87)    |
| 2013-2014                                   | 1.23 (0.75 to 1.70)             | 1.37 (1.11 to 1.64)    |
| 2015-2016                                   | 1.00 (0.58 to 1.42)             | 0.79 (0.53 to 1.05)    |
| <i>P</i> for trend                          | <.001                           | <.001                  |

<sup>a</sup> Participants characteristics were presented by age group: adolescents 12-19 years, ≥20 years. All estimates were weighted to be nationally representative.

<sup>b</sup> "Other" include race other than non-Hispanic white, non-Hispanic black, and Hispanic, including multi-racial.

<sup>c</sup> Calculated as tests for trend using the median value of each category as a continuous variable.

<sup>d</sup> For weight status definition, see the Methods section.

<sup>e</sup> *P* for trend was calculated using continuous BMI.

<sup>f</sup> For leisure-time definition, see the Methods section.

**eTable 10. Weighted Linear Regression Models of Total Sitting Time (h/d) Among Adults and Adolescents, NHANES 2015-2016<sup>a</sup>**

|                                             | Regression Coefficient (95% CI) |                        |
|---------------------------------------------|---------------------------------|------------------------|
|                                             | 12-19 years                     | ≥20 years              |
| Age                                         | -0.25 (-0.37 to -0.13)          | -0.01 (-0.02 to 0.00)  |
| Sex                                         |                                 |                        |
| Female                                      | 0 [Reference]                   | 0 [Reference]          |
| Male                                        | -0.01 (-0.41 to 0.40)           | 0.08 (-0.35 to 0.50)   |
| Race/ethnicity                              |                                 |                        |
| Non-Hispanic white                          | 0 [Reference]                   | 0 [Reference]          |
| Non-Hispanic black                          | 0.16 (-0.31 to 0.64)            | -0.33 (-0.77 to 0.12)  |
| Hispanic                                    | -0.04 (-0.48 to 0.40)           | -1.09 (-1.48 to -0.70) |
| Other <sup>b</sup>                          | 0.51 (0.07 to 0.95)             | -0.36 (-0.72 to 0.01)  |
| Annual household income                     |                                 |                        |
| <\$25,000                                   | 0 [Reference]                   | 0 [Reference]          |
| \$25,000-<\$75,000                          | 0.22 (-0.04 to 0.49)            | 0.34 (-0.05 to 0.73)   |
| ≥\$75,000                                   | 0.02 (-0.68 to 0.72)            | 0.82 (0.36 to 1.29)    |
| <i>P</i> for trend <sup>c</sup>             | .81                             | <.001                  |
| Weight status <sup>d</sup>                  |                                 |                        |
| Normal                                      | 0 [Reference]                   | 0 [Reference]          |
| Overweight                                  | 0.36 (-0.18 to 0.89)            | 0.24 (-0.10 to 0.58)   |
| Obese                                       | 0.53 (0.05 to 1.02)             | 0.72 (0.27 to 1.17)    |
| <i>P</i> for trend <sup>e</sup>             | .006                            | .003                   |
| Leisure-time physical activity <sup>f</sup> |                                 |                        |
| Active                                      | 0 [Reference]                   | 0 [Reference]          |
| Inactive                                    | 0.25 (-0.21 to 0.71)            | 0.36 (0.11 to 0.61)    |
| Educational attainment <sup>g</sup>         |                                 |                        |
| <High school                                |                                 | 0 [Reference]          |
| High school                                 |                                 | 0.58 (0.16 to 1.01)    |
| >High school                                |                                 | 1.39 (0.93 to 1.86)    |
| Smoking status <sup>g</sup>                 |                                 |                        |
| Never                                       |                                 | 0 [Reference]          |
| Former                                      |                                 | 0.07 (-0.37 to 0.51)   |
| Current                                     |                                 | -0.37 (-0.75 to 0.02)  |

<sup>a</sup> Participant characteristics were presented by age group: 12-19 years and ≥20 years. All estimated means and prevalence are weighted to be nationally representative.

<sup>b</sup> "Other" includes race other than non-Hispanic white, non-Hispanic black, or Hispanic, including multiracial.

<sup>c</sup> Calculated as tests for trend using the median value of each category as a continuous variable.

<sup>d</sup> For weight status definition, see the Methods section.

<sup>e</sup> *P* for trend was calculated using continuous BMI.

<sup>f</sup> For leisure-time physical activity definition, see the Methods section.

<sup>g</sup> Information on educational attainment and smoking status was collected only among participants 20 years or older.
